# Supplementary material
Source: PubMed Central journal article supplement (PMC3038754)
Supplement: 1018642108_pnas.201018642SI.pdf [file 1018642108_pnas.201018642SI.pdf]

# Supporting Information

Ricklefs 10.1073/pnas.1018642108

## SI Text S1. Plot and Species Selection

All data were obtained from the Breeding Bird Census (BBC) program in Canada and the United States. The program is described by James D. Lowe on the website <http://www.pwrc.usgs.gov/birds/bbc.html>. Further information, including the quality and limitations of the BBC data, can be obtained from refs. 1 and 2.

The BBC program should not be confused with the Breeding Bird Survey (BBS) program (<http://www.pwrc.usgs.gov/BBS/index.html>), which reports species seen or heard along a large number of 25-km, 50-stop survey routes, each of which is driven once each year.

BBC data were kindly made available in digital format by James D. Lowe of the Cornell University (Ithaca, NY) Laboratory of Ornithology. The data cover census years 1991–1996 and included 763 censuses conducted at 278 sites (average 2.7 censuses per site) in which a total of 385 species of bird were recorded. I restricted the sample to census plots and birds typical of eastern forests (deciduous, needle-leafed, and mixed). This region corresponds to the Eastern Temperate Forest Region (Region 8) of the Commission for Environmental Cooperation (3) and the Temperate Broadleaf and Mixed Forest Ecoregion of the World Wildlife Fund (4). Topography is moderate and regional conditions are dominated by a north–south temperature gradient and an east–west precipitation gradient. I excluded raptorial (hawks and owls) and galliform (quail and grouse) species, which occurred in very low densities. Initially, censuses were retained if they included mostly eastern forest habitat; all grasslands, marshes, savannas, and shrublands were excluded, leaving 397 censuses from 146 sites including 119 species. I further deleted 33 species present at <10 sites (retaining golden-crowned kinglet and Nashville warbler, with 8 sites apiece) and also several species present at >10 sites but not typically forest birds (common grackle, eastern kingbird, red-winged blackbird, European starling, American goldfinch, tree swallow, eastern bluebird), leaving 79 species. Next, 4 sites with <12 remaining species among the 79 were deleted, leaving 142 sites (Fig. S1). Basic statistics for plots, and plot and species lists, are provided in Tables S1–S3.

## SI Text S2. Plot Ordinations

Stand ordinations were performed in PCORD (<http://home.centurytel.net/~mjm/pcordwin.htm>). I used a Bray–Curtis ordination with the default parameters (Sorensen distance measure; variance-regression endpoint selection measure; Euclidean axis projection geometry; Euclidean residual distances; number of axes = 9; scores calculated for species by weighted averaging). Nine axes reported by the software extracted 64.2% of the original variance in the data, as shown in Table S4. Distributions of the axis scores over the 142 sites are summarized in Table S5.

The proportions of the variance extracted were compared with a broken-stick model of random subdivision of the total variance,  $p_k = \frac{1}{s} \sum_{j=0}^{s-k} \frac{1}{s-j}$ , where  $p$  is the proportion of the  $k$ th smallest of  $s$  segments (5). The variance of the ordinated axes exceeds the broken-stick expectation through seven axes. An ordination of row-shuffled species data (densities at a site randomly assigned to each of the 79 species regardless of its presence in the community) placed 2.2–3.0% of the variance on each axis.

The species  $\times$  site incidence matrix was also subjected to ordination by correspondence (redundancy) analysis (RA, with down-weighted rare species), which returned three axes representing 39% of the distributional variance, and nonmetric multidimensional scaling (NMS), which returned two significant

axes. The site scores from the RA and NMS ordinations were compared with those from the Bray–Curtis (BC) ordination by canonical correlation analysis (SAS procedure CANCELL). The RA scores explained 93, 85, and 67% of the variation in the first three BC axes, but only 8–37% of the variation in axes 4–9. The NMS scores explained 88 and 85% of the variation in the first two BC axes, but only 0–34% of the variation in axes 3–9.

As is common in Bray–Curtis ordination, the derived axes were not fully orthogonal. The 36 Pearson product-moment correlations among the scores of the 142 census sites on the nine axes averaged  $0.025 \pm 0.172$  SD, and the  $P$ -values averaged  $0.255 \pm 0.265$  SD, with 11 of the 36 having  $P < 0.05$ . The correlations among the scores of the 79 species on the nine axes averaged  $-0.034 \pm 0.322$  SD, and the  $P$  values averaged  $0.180 \pm 0.264$  SD, with 17 of the 36 having  $P < 0.05$ . The nearly twofold greater SD in the correlation coefficients calculated for species compared with those calculated for sites reflects the similar habitat preferences of many species.

Thirty-nine of the species in this analysis also were included in James's (6) classic study of the distribution of forest birds with respect to habitat (vegetation structure) characteristics in Arkansas. The ordination scores for these species on BC axes 1, 3, and 4, calculated across the eastern North American sites, were statistically related ( $F_{3,35} = 16.6$ ,  $P < 0.0001$ ,  $R^2 = 0.59$ ) to a discriminant function that James (6) used to separate the distributions of these species in Arkansas across several habitat principal components. The correspondence between these two approaches emphasizes the close association of several of the BC axes with habitat variables important to birds, including forest canopy height and openness.

## SI Text S3. Climate Correlations

For the latitude–longitude coordinates for each of the census sites, 19 BIOCLIM variables (<http://fennerschool.anu.edu.au/publications/software/anuclim/doc/bioclim.html>) based on monthly or weekly values of maximum temperature, minimum temperature, and precipitation were downloaded into a data file: P1, annual mean temperature; P2, mean diurnal range (mean(period max-min)); P3, isothermality (P2/P7); P4, temperature seasonality (coefficient of variation); P5, max temperature of warmest period; P6, min temperature of coldest period; P7, temperature annual range (P5–P6); P8, mean temperature of wettest quarter; P9, mean temperature of driest quarter; P10, mean temperature of warmest quarter; P11, mean temperature of coldest quarter; P12, annual precipitation; P13, precipitation of wettest period; P14, precipitation of driest period; P15, precipitation seasonality (coefficient of variation); P16, precipitation of wettest quarter; P17, precipitation of driest quarter; P18, precipitation of warmest quarter; and P19, precipitation of coldest quarter. Variables P4, P13, P15, and P16 were then  $\log_{10}$ -transformed to make the distributions more nearly normal. Using stepwise regression with backward elimination (SAS procedure STEPWISE), the proportions of the variance in the BC scores accounted for by the BIOCLIM variables were BC1 = 0.81, BC2 = 0.58, BC3 = 0.34, BC4 = 0.46, BC5 = 0.32, BC6 = 0.51, BC7 = 0.52, BC8 = 0.18, and BC9 = 0.33. In a canonical correlation analysis (SAS procedure CANCELL) relating scores on the nine BC ordination axes to the 19 BIOCLIM variables, seven of nine correlations for the canonical axes were  $P < 0.001$ , and the correlations varied between 0.96 and 0.35. Thus, especially the first BC axis picks up a strong climate gradient (from south to north in eastern North America), whereas

the other axes are related to climate to varying degrees, but not particularly strongly in most cases.

#### SI Text S4. Species Richness and Population Density

Using the SAS STEPWISE procedure with backward elimination of variables, the log-transformed number of species reported from each census site was significantly related ( $F_{6,135} = 60.2$ ,  $P < 0.0001$ ,  $R^2 = 0.73$ ) to the log-transformed number of territories, partly reflecting the size of the census plot ( $b = 0.342 \pm 0.030$ ,  $F = 133$ ,  $P < 0.0001$ ) and five of the BC axis scores, but especially BC4 ( $F = 122$ ,  $P < 0.0001$ ) and BC6 ( $F = 57$ ,  $P < 0.0001$ ). None of the squared terms was significant in a general linear model (SAS GLM procedure) with all nine BC axes included; and neither were the interaction terms between BC4, BC6, and BC9, which controlled most of the variation.

After entering the log-transformed number of territories ( $b = 0.372 \pm 0.037$ ,  $F = 99.8$ ,  $P < 0.0001$ ), the BIOCLIM variables P4, P6, P15, P16, and P17 contributed statistically only marginally ( $P = 0.008$ – $0.068$ ) to variation in the log-transformed density after backward elimination of nonsignificant variables in the SAS STEPWISE procedure ( $F_{6,135} = 20.9$ ,  $P < 0.0001$ ,  $R^2 = 0.493$ ).

The overall density of birds on census plots was also well described by the Bray–Curtis scores ( $F_{9,132} = 51.5$ ,  $P < 0.0001$ ,  $R^2 = 0.78$ ), with significant contributions of the log-transformed number of species ( $P = 0.002$ ) and all of the ordination axes ( $P = 0.0001$ – $0.048$ ) except BC2. The relationship was not improved by squared terms or interactions. Overall density was also significantly related ( $F_{10,131} = 3.6$ ,  $P = 0.0003$ ,  $R^2 = 0.22$ ) to BIOCLIM variables P1, P2, P5, P6, P8, P9, P11, P12, P16, and P17.

#### SI Text S5. Nested Analysis of Variance

I used the taxonomic assignments set forth in the TIF World List, version 4.1 (January 6, 2010), compiled by S. Nawrocki, University of Indianapolis, based on the “Taxonomy in Flux” weblist of birds of the world by J. Boyd (<http://jboyd.net/Taxo/List.html>). This taxonomy is updated regularly on the basis of recently published molecular phylogenies of birds and provides a nesting of species in a taxonomic hierarchy according to uniform criteria (see the list of species in *SI Text S1*, above). Analyses were carried out with the SAS procedures NESTED and MIXED, the latter using restricted maximum likelihood (REML) estimation and the denominator degrees of freedom estimated by the Satterthwaite method. Proc MIXED was used to check on the statistical significance of variance at higher taxonomic levels. Results of these analyses are presented in *Tables S6* (site data), *S7* (BC axis score means), *S8* (BC axis score standard deviations), *S9* (morphological principal components), and *S10* (morphological ANOVAs).

#### SI Text S6. Rank Correlation Statistics

Significant values of Spearman’s rank correlation coefficient ( $r$ ) exceed a value of  $t = 2$  ( $\sim P = 0.05$ ), where  $t = r\sqrt{(n-2)/(1-r^2)}$  (7). For  $n = 142$  census sites and  $t = 2$ , the critical value of  $r = 0.167$ , which corresponds to about 2 times the SD of the correlation coefficients for randomized data.

#### SI Text S7. Foraging Group Analysis

The 79 species were divided into 20 taxonomically based, evolutionarily monophyletic foraging groups: warblers (22 species), finches (10 species), woodpeckers (7 species), vireos (5 species), thrushes (5 species), flycatchers (5 species), icterid (4 species), parid (3 species), wren (3 species), corvid (2 species), mimid (2 species), nuthatch (2 species), tanager (2 species), creeper

(1 species), cuckoo (1 species), dove (1 species), gnatcatcher (1 species), hummingbird (1 species), kinglet (1 species), and waxwing (1 species). Morphological data were not available for two woodpeckers, a wren, and the hummingbird ( $n = 75$ ). Eight principal component axes based on eight log-transformed morphological variables (total length, wing length, tail length, tarsus length, midtoe length, and the length, width, and depth of the bill measured at its base) were subjected to a one-way analysis of variance with foraging group as the main effect. The statistical tests for each of the PC axes are presented in *Table S7*. The density of each species averaged over all 142 census plots (i.e., including zeroes) exhibited a similar positive trend with respect to number of species per group, but the relationship was not significant ( $F_{1,17} = 3.87$ ,  $P = 0.066$ ).

#### SI Text S8. Population Size Distribution

The total population size of a species (summed local densities over the entire region,  $n = 142$  plots) varied widely among species, from 1.3 (brown thrasher) to 84.1 (red-eyed vireo). The distribution of the total population sizes conforms closely to a geometric distribution (*Fig. S2*) (8), except for the overly abundant populations of the ovenbird (*Seiurus aurocapillus*) and the red-eyed vireo (*Vireo olivaceus*). A geometric distribution can result from a random birth–death process with homogeneous rates. It can also represent the “broken-stick” distribution for  $n$  species obtained by randomly breaking a line (representing the summed abundance of all species) at  $n - 1$  points (5, 9). Either way, the distribution of species abundances within the regional community cannot be distinguished from the outcome of several types of random processes.

#### SI Text S9. Sister Species Distributions

The distribution of geographic range sizes within a region depends, in part, on the mechanism of species formation, the resulting sizes of the isolated daughter populations, and the subsequent expansion of the ranges of those populations (10). The geographic distributions of birds included in this analysis, and those of their closest relatives, suggest that species richness within the regional community is driven primarily by species formation occurring broadly within North America and not within the eastern deciduous forest biome. Thus, relative range sizes within the regional community are not directly influenced by species formation and the subdivision of ancestral distributions. For example, in the genus *Dendroica* (including *Parula*) (11, 12), with nine species included in this analysis, plus three species represented in <10 census sites, sister taxa of several of the species occur outside the regional community, either in southwestern North America (*Dendroica chrysoparia* as sister to *Dendroica virens*; *Parula pitayumi* as sister to *Parula americana*) or in boreal forest to the north [*Dendroica castanea* as sister to *Dendroica fusca*; *Dendroica striata* as sister to *Dendroica pensylvanica*; and possibly *Dendroica palmarum* as sister to *Dendroica pinus*, although the relationships are unclear and *D. pinus* might be more closely related to *Dendroica dominica*, which occurs largely within the study area (but was infrequent in the census sites considered here), or to *Dendroica coronata*, which occurs in the northern part of the study area and in boreal forest].

Little can be said about extinction in this regional community, except that several species of eastern North American birds, including Kirtland’s warbler (*Dendroica kirtlandii*) and Bachman’s warbler (*Vermivora bachmanii*), currently have small, localized populations and, in the latter case, might be extinct.

1. Kennedy JA, Dilworth-Christie P, Erskine AJ (1999) The Canadian Breeding Bird (Mapping) Census Database. Technical Report Series No. 342, (Canadian Wildlife Service, Ottawa, Ontario. Available at <http://dsp-psd.pwgsc.gc.ca/Collection/CW69-5-342E.pdf>. Accessed January 12, 2011.

2. Johnston DW (1990) Descriptions of surveys: Breeding Bird Census. *Survey Designs and Statistical Methods for the Estimation of Avian Population Trends*, US Fish and Wildlife Service Biological Report, eds Sauer JR, Droege S, (US Fish and Wildlife Service, Washington, DC), Vol 90, Issue 1, pp 33–36.



**Table S1. Basic statistics for the plots (data for species and territories averaged over years)**

|          | Latitude | Longitude | Years | Species | Territories | Plot size, ha | Elevation, m |
|----------|----------|-----------|-------|---------|-------------|---------------|--------------|
| <i>N</i> | 142      | 142       | 142   | 142     | 142         | 142           | 103          |
| Average  | 39.53    | 80.45     | 2.7   | 25.6    | 88.7        | 13.4          | 291.2        |
| SD       | 4.25     | 6.79      | 1.9   | 7.8     | 44.1        | 5.8           | 301.5        |
| Minimum  | 30.28    | 63.52     | 1     | 11.8    | 16.5        | 6             | 1.5          |
| Maximum  | 47.13    | 95.35     | 6     | 50.5    | 270.2       | 42.3          | 1511         |

**Table S2. List of plots used in the analysis**

|    | Site      | State | Latitude | Longitude | Years | Species | Territories | Plot size | Elevation |
|----|-----------|-------|----------|-----------|-------|---------|-------------|-----------|-----------|
| 1  | Brewer    | FL    | 30.40    | 84.15     | 1     | 29.0    | 124.5       | 15.7      | 53.5      |
| 2  | CT1253099 | CT    | 41.22    | 72.06     | 5     | 34.0    | 93.9        | 23.1      | —         |
| 3  | CT1265009 | CT    | 41.42    | 73.13     | 6     | 35.8    | 92.7        | 8.5       | —         |
| 4  | CT1289097 | CT    | 41.27    | 72.19     | 6     | 20.0    | 110.8       | 10.5      | 122.0     |
| 5  | CT1291035 | CT    | 41.46    | 72.30     | 4     | 33.3    | 119.3       | 21.5      | 97.0      |
| 6  | CT2765006 | CT    | 41.42    | 73.12     | 6     | 44.5    | 102.5       | 10.1      | —         |
| 7  | CT2765008 | CT    | 41.43    | 73.12     | 6     | 42.8    | 114.5       | 10.5      | —         |
| 8  | CT2778262 | CT    | 41.42    | 73.10     | 6     | 43.8    | 98.4        | 8.5       | —         |
| 9  | CT2787001 | CT    | 41.53    | 73.24     | 2     | 22.5    | 75.0        | 15.8      | —         |
| 10 | Carlile   | GA    | 32.02    | 81.48     | 2     | 33.0    | 64.3        | 20.0      | 38.5      |
| 11 | DC0461014 | DC    | 38.57    | 77.03     | 6     | 24.2    | 74.5        | 26.3      | —         |
| 12 | DC1060009 | DC    | 38.55    | 77.05     | 6     | 41.3    | 270.2       | 14.2      | —         |
| 13 | Dawson    | SC    | 33.13    | 80.20     | 5     | 20.6    | 126.5       | 8.4       | 15.0      |
| 14 | Dowell    | MD    | 38.54    | 76.46     | 1     | 34.0    | 179.5       | 14.5      | 49.0      |
| 15 | Eddleman  | MO    | 37.21    | 89.30     | 1     | 25.0    | 68.0        | 11.3      | —         |
| 16 | Elliott1  | LA    | 32.21    | 91.20     | 1     | 31.0    | 110.0       | 13.5      | 24.0      |
| 17 | Elliott2  | LA    | 32.20    | 91.20     | 1     | 30.0    | 123.0       | 13.5      | 23.0      |
| 18 | Elliott3  | LA    | 32.19    | 91.21     | 1     | 28.0    | 102.0       | 13.5      | 22.5      |
| 19 | Elliott4  | LA    | 32.19    | 91.20     | 1     | 22.0    | 103.0       | 13.5      | 23.0      |
| 20 | FF        | NC    | 35.53    | 79.00     | 6     | 30.5    | 97.1        | 12.6      | —         |
| 21 | FL0393022 | FL    | 30.28    | 84.30     | 1     | 17.0    | 34.5        | 12.0      | 37.0      |
| 22 | FL0393023 | FL    | 30.29    | 84.32     | 4     | 14.5    | 33.9        | 10.5      | 24.0      |
| 23 | Fallon    | MD    | 38.55    | 76.46     | 1     | 32.0    | 140.0       | 14.5      | 52.0      |
| 24 | Fox       | MO    | 37.02    | 90.07     | 1     | 28.0    | 110.0       | 10.6      | 103.5     |
| 25 | GA0493113 | GA    | 30.45    | 84.00     | 2     | 37.5    | 110.3       | 20.0      | —         |
| 26 | GA0493114 | GA    | 30.45    | 84.00     | 2     | 34.0    | 122.3       | 20.0      | —         |
| 27 | Gauthey   | MD    | 38.58    | 77.08     | 5     | 23.4    | 69.5        | 7.6       | 16.5      |
| 28 | Gutsell   | ON    | 42.34    | 80.17     | 1     | 23.0    | 137.5       | 12.0      | —         |
| 29 | Hinkle    | VA    | 38.33    | 79.04     | 2     | 13.0    | 33.8        | 6.1       | —         |
| 30 | Hochadel  | OH    | 41.26    | 80.46     | 3     | 31.3    | 64.8        | 12.1      | 275.0     |
| 31 | KS3391021 | KS    | 38.55    | 95.13     | 3     | 27.3    | 48.8        | 10.1      | 251.5     |
| 32 | Knapp     | MI    | 42.14    | 85.03     | 6     | 47.0    | 208.5       | 28.2      | 285.0     |
| 33 | Koehler   | SC    | 33.19    | 81.50     | 1     | 20.0    | 81.0        | 12.7      | 36.0      |
| 34 | MA1291049 | MA    | 42.21    | 71.19     | 1     | 31.0    | 162.5       | 28.0      | 91.5      |
| 35 | MA1293106 | MA    | 42.23    | 72.42     | 2     | 24.0    | 59.8        | 10.1      | 202.0     |
| 36 | MA1293107 | MA    | 42.17    | 72.39     | 2     | 21.5    | 36.3        | 10.1      | 43.0      |
| 37 | MD0490088 | MD    | 39.03    | 76.49     | 1     | 38.0    | 241.0       | 42.0      | —         |
| 38 | MD049008a | MD    | 39.00    | 76.47     | 1     | 43.0    | 186.0       | 38.0      | 36.5      |
| 39 | MD1071036 | MD    | 39.12    | 76.54     | 3     | 29.7    | 134.2       | 11.9      | 108.5     |
| 40 | MDF       | NC    | 35.54    | 79.01     | 6     | 26.0    | 73.3        | 12.6      | —         |
| 41 | ME27      | ME    | 44.54    | 68.40     | 2     | 22.0    | 42.5        | 10.4      | —         |
| 42 | ME2889052 | ME    | 45.25    | 70.10     | 6     | 28.7    | 67.3        | 16.0      | 463.5     |
| 43 | MI2885037 | MI    | 46.45    | 85.06     | 4     | 12.0    | 39.1        | 16.0      | —         |
| 44 | MI2892103 | MI    | 46.27    | 84.57     | 2     | 20.0    | 87.3        | 18.6      | 777.0     |
| 45 | MI2892104 | MI    | 46.26    | 84.57     | 2     | 14.0    | 69.5        | 18.6      | 875.0     |
| 46 | MI2892105 | MI    | 46.26    | 84.47     | 2     | 21.0    | 103.3       | 18.6      | 700.0     |
| 47 | MI2892106 | MI    | 46.25    | 84.58     | 2     | 14.5    | 73.3        | 18.6      | 895.0     |
| 48 | MN1793105 | MN    | 44.06    | 91.44     | 3     | 31.0    | 126.2       | 12.2      | 213.3     |
| 49 | MN2090021 | MN    | 47.10    | 95.10     | 2     | 21.0    | 98.3        | 10.0      | 495.3     |
| 50 | MN2090022 | MN    | 47.13    | 95.12     | 2     | 29.0    | 132.5       | 11.5      | 452.5     |
| 51 | MN2090023 | MN    | 47.13    | 95.12     | 2     | 17.5    | 116.8       | 10.0      | 483.0     |
| 52 | MN2091070 | MN    | 47.05    | 95.35     | 3     | 21.3    | 145.2       | 13.4      | 466.5     |
| 53 | MN2091071 | MN    | 46.57    | 95.34     | 2     | 20.0    | 78.0        | 13.4      | 452.5     |



Table S2. Cont.

|     | Site      | State | Latitude | Longitude | Years | Species | Territories | Plot size | Elevation |
|-----|-----------|-------|----------|-----------|-------|---------|-------------|-----------|-----------|
| 54  | MN3091044 | MN    | 47.12    | 95.10     | 1     | 15.0    | 73.5        | 10.0      | 466.5     |
| 55  | Marshall  | NY    | 42.29    | 76.27     | 1     | 20.0    | 36.0        | 13.5      | —         |
| 56  | Moore     | MS    | 32.14    | 90.49     | 5     | 36.8    | 146.6       | 10.0      | —         |
| 57  | Mullins   | MI    | 42.00    | 86.33     | 6     | 13.8    | 20.5        | 8.5       | —         |
| 58  | NJ1064032 | NJ    | 41.04    | 74.11     | 5     | 20.6    | 37.0        | 16.2      | —         |
| 59  | NY0989093 | NY    | 40.52    | 73.47     | 3     | 21.3    | 62.5        | 10.1      | —         |
| 60  | NY0991069 | NY    | 40.54    | 73.53     | 2     | 25.0    | 74.5        | 10.0      | 39.5      |
| 61  | NY0995101 | NY    | 40.37    | 74.10     | 1     | 19.0    | 26.0        | 16.2      | 1.5       |
| 62  | NY1383002 | NY    | 41.46    | 74.09     | 2     | 50.5    | 150.0       | 42.3      | 228.5     |
| 63  | NY1392063 | NY    | 41.44    | 74.13     | 1     | 26.0    | 83.0        | 15.8      | 335.5     |
| 64  | NY1395014 | NY    | 41.44    | 74.12     | 2     | 21.0    | 36.5        | 12.0      | 345.0     |
| 65  | NY1686026 | NY    | 43.20    | 76.44     | 6     | 28.5    | 76.5        | 16.2      | 88.5      |
| 66  | NY1689013 | NY    | 43.22    | 76.40     | 1     | 25.0    | 95.0        | 16.2      | 87.0      |
| 67  | NY2474107 | NY    | 42.08    | 77.45     | 6     | 32.2    | 85.1        | 16.6      | —         |
| 68  | NY2491013 | NY    | 42.29    | 76.27     | 1     | 23.0    | 36.5        | 17.3      | —         |
| 69  | NY2494046 | NY    | 42.40    | 78.22     | 3     | 30.3    | 62.3        | 11.0      | 452.5     |
| 70  | OH1591043 | OH    | 39.15    | 84.46     | 6     | 25.8    | 94.9        | 16.0      | 215.0     |
| 71  | OH1593017 | OH    | 38.46    | 83.26     | 2     | 23.0    | 69.3        | 10.0      | 290.0     |
| 72  | OH1596017 | OH    | 38.42    | 83.26     | 1     | 20.0    | 70.0        | 10.0      | —         |
| 73  | OH1689033 | OH    | 41.28    | 83.46     | 6     | 36.5    | 138.7       | 18.0      | —         |
| 74  | OH2237200 | OH    | 40.11    | 82.19     | 4     | 29.0    | 57.3        | 14.2      | 297.0     |
| 75  | OH2291008 | OH    | 39.30    | 82.34     | 3     | 29.0    | 107.5       | 10.0      | —         |
| 76  | OHFI      | KS    | 38.48    | 95.12     | 1     | 17.0    | 37.0        | 8.1       | —         |
| 77  | OHFII     | KS    | 38.49    | 95.12     | 1     | 13.0    | 24.5        | 8.1       | —         |
| 78  | OHFIII    | KS    | 38.49    | 95.11     | 1     | 22.0    | 42.5        | 8.1       | —         |
| 79  | PA1091004 | PA    | 40.09    | 75.03     | 6     | 21.8    | 76.0        | 10.0      | 73.0      |
| 80  | PA1093123 | PA    | 40.17    | 75.57     | 3     | 17.3    | 41.0        | 10.9      | 185.5     |
| 81  | PA1377204 | PA    | 41.04    | 76.07     | 2     | 30.0    | 56.5        | 6.0       | —         |
| 82  | PA1377205 | PA    | 41.05    | 76.09     | 2     | 37.0    | 98.5        | 11.1      | —         |
| 83  | PA1382312 | PA    | 40.44    | 75.50     | 6     | 17.3    | 43.2        | 19.3      | —         |
| 84  | PA1382313 | PA    | 40.45    | 75.50     | 6     | 18.5    | 44.3        | 16.9      | —         |
| 85  | PA1391026 | PA    | 40.44    | 77.55     | 6     | 29.5    | 97.3        | 19.2      | 282.5     |
| 86  | PA1394005 | PA    | 40.43    | 77.45     | 3     | 26.3    | 129.0       | 27.0      | 432.5     |
| 87  | PA2493079 | PA    | 41.21    | 79.13     | 2     | 25.5    | 133.8       | 15.0      | 471.5     |
| 88  | PA2493080 | PA    | 41.20    | 79.13     | 2     | 25.5    | 152.0       | 15.0      | 480.5     |
| 89  | PA2493081 | PA    | 41.20    | 79.13     | 2     | 24.0    | 93.3        | 18.2      | 409.0     |
| 90  | PA2493082 | PA    | 41.24    | 79.13     | 2     | 26.5    | 131.0       | 15.0      | 473.5     |
| 91  | PA2493083 | PA    | 41.39    | 78.57     | 2     | 26.0    | 153.5       | 12.0      | 564.0     |
| 92  | PA2493084 | PA    | 41.39    | 78.56     | 2     | 29.0    | 136.8       | 12.0      | 553.5     |
| 93  | PA2494117 | PA    | 41.10    | 74.54     | 1     | 17.0    | 59.5        | 12.3      | 152.5     |
| 94  | PA2494130 | PA    | 41.39    | 79.58     | 1     | 35.0    | 77.5        | 7.5       | 420.5     |
| 95  | PA2494131 | PA    | 41.34    | 80.20     | 1     | 29.0    | 63.5        | 9.8       | 386.0     |
| 96  | PA2494132 | PA    | 40.39    | 78.34     | 1     | 33.0    | 75.0        | 10.3      | 494.0     |
| 97  | PA2494133 | PA    | 41.11    | 78.43     | 1     | 29.0    | 87.0        | 15.0      | 548.5     |
| 98  | PA2494134 | PA    | 41.20    | 79.12     | 1     | 25.0    | 160.5       | 15.0      | 451.5     |
| 99  | PA2494135 | PA    | 41.38    | 78.57     | 1     | 26.0    | 111.5       | 12.0      | 521.5     |
| 100 | PA2494136 | PA    | 41.38    | 78.57     | 1     | 25.0    | 130.0       | 12.0      | 554.5     |
| 101 | PA2494137 | PA    | 41.42    | 79.15     | 1     | 24.0    | 104.0       | 12.0      | 556.5     |
| 102 | PA2494138 | PA    | 41.42    | 79.15     | 1     | 27.0    | 88.0        | 10.0      | 553.0     |
| 103 | PA2494139 | PA    | 40.08    | 79.15     | 3     | 14.7    | 36.7        | 10.0      | 826.0     |
| 104 | Palmer    | ON    | 42.33    | 80.10     | 1     | 25.0    | 69.5        | 10.0      | 178.5     |
| 105 | Payzant   | NS    | 44.55    | 63.52     | 1     | 18.0    | 49.5        | 12.3      | 175.0     |
| 106 | Prior     | ON    | 42.33    | 80.17     | 1     | 27.0    | 164.5       | 12.0      | 178.5     |
| 107 | RI1290086 | RI    | 41.30    | 71.35     | 4     | 22.3    | 76.0        | 10.1      | —         |
| 108 | RI1290087 | RI    | 41.27    | 71.29     | 5     | 24.0    | 83.5        | 10.1      | 15.0      |
| 109 | RI1291062 | RI    | 41.36    | 71.46     | 5     | 26.0    | 87.4        | 10.2      | 130.0     |
| 110 | RI1291065 | RI    | 41.44    | 71.43     | 5     | 21.2    | 73.3        | 10.6      | 155.0     |
| 111 | RI1294106 | RI    | 41.50    | 71.33     | 2     | 23.5    | 60.5        | 10.6      | 131.0     |
| 112 | RI1294110 | RI    | 41.36    | 71.34     | 1     | 29.0    | 91.5        | 10.3      | 91.0      |
| 113 | ROSMF     | ON    | 42.34    | 80.15     | 2     | 25.5    | 121.3       | 11.0      | 181.5     |
| 114 | SC0492031 | SC    | 33.19    | 81.38     | 3     | 25.3    | 77.5        | 12.2      | 62.5      |
| 115 | SC0492033 | SC    | 33.07    | 81.39     | 2     | 21.5    | 59.3        | 11.0      | 26.0      |

Table S2. Cont.

|     | Site      | State | Latitude | Longitude | Years | Species | Territories | Plot size | Elevation |
|-----|-----------|-------|----------|-----------|-------|---------|-------------|-----------|-----------|
| 116 | SC0492034 | SC    | 33.22    | 81.34     | 3     | 25.7    | 57.0        | 12.2      | 80.5      |
| 117 | SC0492035 | SC    | 33.15    | 81.44     | 1     | 19.0    | 44.0        | 12.2      | 56.5      |
| 118 | SC0492036 | SC    | 33.17    | 81.47     | 3     | 23.0    | 87.8        | 12.2      | 40.5      |
| 119 | SC0493100 | SC    | 33.11    | 81.34     | 2     | 17.0    | 30.3        | 12.2      | 77.5      |
| 120 | SC0493102 | SC    | 33.22    | 81.30     | 2     | 16.5    | 25.3        | 12.2      | 100.5     |
| 121 | SC0493133 | SC    | 33.19    | 81.51     | 3     | 23.0    | 81.3        | 12.3      | 39.0      |
| 122 | SC0495040 | SC    | 33.19    | 81.52     | 1     | 17.0    | 102.0       | 11.4      | 32.5      |
| 123 | SC0495051 | SC    | 33.18    | 81.43     | 1     | 13.0    | 16.5        | 12.2      | 66.5      |
| 124 | Snyder    | PA    | 41.52    | 80.08     | 1     | 44.0    | 80.5        | 8.1       | —         |
| 125 | Swanson   | WI    | 44.00    | 91.27     | 1     | 28.0    | 85.0        | 12.6      | 265.0     |
| 126 | TFAT      | CT    | 41.22    | 72.06     | 5     | 25.6    | 25.3        | 6.5       | —         |
| 127 | TN1491015 | TN    | 36.08    | 85.27     | 6     | 42.3    | 51.3        | 10.2      | 309.0     |
| 128 | TN2392093 | TN    | 36.08    | 82.18     | 5     | 11.8    | 37.6        | 9.9       | 1511.0    |
| 129 | TN2392102 | TN    | 35.19    | 84.02     | 5     | 14.2    | 80.2        | 10.2      | 1457.0    |
| 130 | TS        | ON    | 42.33    | 80.05     | 2     | 29.5    | 121.8       | 8.8       | 178.5     |
| 131 | TWCS      | ON    | 42.33    | 80.05     | 1     | 33.0    | 101.0       | 8.8       | 178.5     |
| 132 | TwedtBHF1 | LA    | 32.21    | 91.20     | 1     | 29.0    | 106.0       | 13.5      | 24.0      |
| 133 | TwedtBHF2 | LA    | 32.20    | 91.20     | 1     | 26.0    | 128.0       | 13.5      | 23.0      |
| 134 | TwedtBHF3 | LA    | 32.19    | 91.21     | 1     | 22.0    | 114.5       | 13.5      | 22.5      |
| 135 | TwedtBHF4 | LA    | 32.19    | 91.20     | 1     | 25.0    | 135.5       | 13.5      | 23.5      |
| 136 | VA1083031 | VA    | 38.24    | 78.29     | 6     | 17.8    | 56.1        | 6.1       | 907.0     |
| 137 | VA1087013 | VA    | 38.24    | 78.29     | 6     | 16.3    | 55.0        | 6.1       | 843.0     |
| 138 | VA1391037 | VA    | 38.27    | 79.15     | 3     | 14.3    | 36.2        | 6.1       | —         |
| 139 | VA1392010 | VA    | 37.23    | 80.33     | 1     | 15.0    | 31.0        | 10.0      | 1168.0    |
| 140 | VT2791010 | VT    | 43.37    | 72.30     | 4     | 31.3    | 54.6        | 12.3      | 326.5     |
| 141 | Wallace   | ON    | 42.43    | 80.28     | 1     | 19.0    | 44.5        | 11.5      | 219.5     |
| 142 | Wojnowski | ON    | 42.34    | 80.17     | 1     | 25.0    | 152.5       | 12.0      | 178.5     |

Plot size is in hectares; elevation is in meters.

**Table S3. Species in descending order of number of sites occupied, including the taxonomic groups (superfamily, family, genus) used in the nested analysis of variance**

|    | Species code | Group       | Superfamily    | Family        | Genus                 | Species                 |
|----|--------------|-------------|----------------|---------------|-----------------------|-------------------------|
| 1  | REEVIR       | Vireo       | Corvoidea      | Vireonidae    | <i>Vireo</i>          | <i>olivaceus</i>        |
| 2  | EAWPEW       | Flycatcher  | Tyrannoidea    | Tyrannidae    | <i>Contopus</i>       | <i>virens</i>           |
| 3  | DOWWOO       | Woodpecker  | Piciformes     | Picidae       | <i>Dryobates</i>      | <i>pubescens</i>        |
| 4  | GRCLY        | Flycatcher  | Tyrannoidea    | Tyrannidae    | <i>Myiarchus</i>      | <i>crinitus</i>         |
| 5  | BLUJAY       | Corvid      | Corvoidea      | Corvidae      | <i>Cyanocitta</i>     | <i>cristata</i>         |
| 6  | BNHCOW       | Icterid     | Passeroidea    | Icteridae     | <i>Molothrus</i>      | <i>ater</i>             |
| 7  | HAIWOO       | Woodpecker  | Piciformes     | Picidae       | <i>Leuconotopicus</i> | <i>villosus</i>         |
| 8  | TUFTIT       | Parid       | Sylvioidea     | Paridae       | <i>Baeolophus</i>     | <i>bicolor</i>          |
| 9  | WHBNUT       | Nuthatch    | Certhioidea    | Sittidae      | <i>Sitta</i>          | <i>carolinensis</i>     |
| 10 | NORCAR       | Finch       | Passeroidea    | Cardinalidae  | <i>Cardinalis</i>     | <i>cardinalis</i>       |
| 11 | SCATAN       | Tanager     | Passeroidea    | Cardinalidae  | <i>Piranga</i>        | <i>olivacea</i>         |
| 12 | WOOTHR       | Thrush      | Muscicapoidea  | Turdidae      | <i>Hylocichla</i>     | <i>mustelina</i>        |
| 13 | PILWOO       | Woodpecker  | Piciformes     | Picidae       | <i>Dryocopus</i>      | <i>pileatus</i>         |
| 14 | BKCCHI       | Parid       | Sylvioidea     | Paridae       | <i>Poecile</i>        | <i>atricapilla</i>      |
| 15 | OVENBI       | Warbler     | Passeroidea    | Parulidae     | <i>Seiurus</i>        | <i>auricapilla</i>      |
| 16 | REBWO        | Woodpecker  | Piciformes     | Picidae       | <i>Melanerpes</i>     | <i>carolinus</i>        |
| 17 | AMEROB       | Thrush      | Muscicapoidea  | Turdidae      | <i>Turdus</i>         | <i>migratorius</i>      |
| 18 | NORFLI       | Woodpecker  | Piciformes     | Picidae       | <i>Colaptes</i>       | <i>auratus</i>          |
| 19 | COMYEL       | Warbler     | Passeroidea    | Parulidae     | <i>Geothlypis</i>     | <i>trichas</i>          |
| 20 | BUGGNA       | Gnatcatcher | Certhioidea    | Poliopitidae  | <i>Poliopitila</i>    | <i>caerulea</i>         |
| 21 | CARWRE       | Wren        | Certhioidea    | Troglodytidae | <i>Thryothorus</i>    | <i>ludovicianus</i>     |
| 22 | ACAFLY       | Flycatcher  | Tyrannoidea    | Tyrannidae    | <i>Empidonax</i>      | <i>virescens</i>        |
| 23 | AMERED       | Warbler     | Passeroidea    | Parulidae     | <i>Setophaga</i>      | <i>ruticilla</i>        |
| 24 | VEERY        | Thrush      | Muscicapoidea  | Turdidae      | <i>Catharus</i>       | <i>fuscescens</i>       |
| 25 | INDBUN       | Finch       | Passeroidea    | Cardinalidae  | <i>Passerina</i>      | <i>cyanea</i>           |
| 26 | MOUDOV       | Dove        | Columbiformes  | Columbidae    | <i>Zenaida</i>        | <i>macroura</i>         |
| 27 | YEBUC        | Cuckoo      | Cuculiformes   | Cuculidae     | <i>Coccyzus</i>       | <i>americanus</i>       |
| 28 | YETVIR       | Vireo       | Corvoidea      | Vireonidae    | <i>Vireo</i>          | <i>flavifrons</i>       |
| 29 | ROBGRO       | Finch       | Passeroidea    | Cardinalidae  | <i>Pheucticus</i>     | <i>ludovicianus</i>     |
| 30 | RUSTOW       | Finch       | Passeroidea    | Passerellidae | <i>Pipilo</i>         | <i>maculatus</i>        |
| 31 | AMECRO       | Corvid      | Corvoidea      | Corvidae      | <i>Corvus</i>         | <i>brachyrhynchus</i>   |
| 32 | BTNWAR       | Warbler     | Passeroidea    | Parulidae     | <i>Dendroica</i>      | <i>virens</i>           |
| 33 | RTHHUM       | Hummingbird | Apodiformes    | Trochilidae   | <i>Archilochus</i>    | <i>colubris</i>         |
| 34 | BRNCRE       | Creepers    | Certhioidea    | Certhiidae    | <i>Certhia</i>        | <i>americana</i>        |
| 35 | GRYCAT       | Mimid       | Muscicapoidea  | Mimidae       | <i>Dumetella</i>      | <i>carolinensis</i>     |
| 36 | HERTHR       | Thrush      | Muscicapoidea  | Turdidae      | <i>Catharus</i>       | <i>guttatus</i>         |
| 37 | BAWWAR       | Warbler     | Passeroidea    | Parulidae     | <i>Mniotilta</i>      | <i>varia</i>            |
| 38 | PINWAR       | Warbler     | Passeroidea    | Parulidae     | <i>Dendroica</i>      | <i>pinus</i>            |
| 39 | CARCHI       | Parid       | Sylvioidea     | Paridae       | <i>Poecile</i>        | <i>carolinensis</i>     |
| 40 | HOOWAR       | Warbler     | Passeroidea    | Parulidae     | <i>Wilsonia</i>       | <i>citrina</i>          |
| 41 | SOLVIR       | Vireo       | Corvoidea      | Vireonidae    | <i>Vireo</i>          | <i>solitarius</i>       |
| 42 | EASTOW       | Finch       | Passeroidea    | Passerellidae | <i>Pipilo</i>         | <i>erythrophthalmus</i> |
| 43 | SONSPA       | Finch       | Passeroidea    | Passerellidae | <i>Melospiza</i>      | <i>melodia</i>          |
| 44 | SUMTAN       | Tanager     | Passeroidea    | Cardinalidae  | <i>Piranga</i>        | <i>rubra</i>            |
| 45 | CHISPA       | Finch       | Passeroidea    | Passerellidae | <i>Spizella</i>       | <i>passerina</i>        |
| 46 | NORORI       | Icterid     | Passeroidea    | Icteridae     | <i>Icterus</i>        | <i>bullocki</i>         |
| 47 | HOUWRE       | Wren        | Certhioidea    | Troglodytidae | <i>Troglodytes</i>    | <i>aedon</i>            |
| 48 | CEDWAX       | Waxwing     | Bombycilloidea | Bombycillidae | <i>Bombycilla</i>     | <i>cedrorum</i>         |
| 49 | NORPAR       | Warbler     | Passeroidea    | Parulidae     | <i>Parula</i>         | <i>americana</i>        |
| 50 | WHEVIR       | Vireo       | Corvoidea      | Vireonidae    | <i>Vireo</i>          | <i>griseus</i>          |
| 51 | BKBWAR       | Warbler     | Passeroidea    | Parulidae     | <i>Dendroica</i>      | <i>fusca</i>            |
| 52 | DAEJUN       | Finch       | Passeroidea    | Passerellidae | <i>Junco</i>          | <i>hyemalis</i>         |
| 53 | EASPHO       | Flycatcher  | Tyrannoidea    | Tyrannidae    | <i>Sayornis</i>       | <i>phoebe</i>           |
| 54 | BTBWAR       | Warbler     | Passeroidea    | Parulidae     | <i>Dendroica</i>      | <i>caerulescens</i>     |
| 55 | KENWAR       | Warbler     | Passeroidea    | Parulidae     | <i>Geothlypis</i>     | <i>formosus</i>         |
| 56 | REBNT        | Nuthatch    | Certhioidea    | Sittidae      | <i>Sitta</i>          | <i>canadensis</i>       |
| 57 | LOUWAT       | Warbler     | Passeroidea    | Parulidae     | <i>Parkesia</i>       | <i>motacilla</i>        |
| 58 | CHSWAR       | Warbler     | Passeroidea    | Parulidae     | <i>Dendroica</i>      | <i>pensylvanica</i>     |
| 59 | WINWRE       | Wren        | Certhioidea    | Troglodytidae | <i>Nannus</i>         | <i>hyemalis</i>         |
| 60 | YEBRAP       | Woodpecker  | Piciformes     | Picidae       | <i>Sphyrapicus</i>    | <i>varius</i>           |
| 61 | MAGWAR       | Warbler     | Passeroidea    | Parulidae     | <i>Dendroica</i>      | <i>magnolia</i>         |
| 62 | WOEWAR       | Warbler     | Passeroidea    | Parulidae     | <i>Helmitheros</i>    | <i>vermivorum</i>       |

**Table S3. Cont.**

|    | Species code | Group      | Superfamily   | Family        | Genus               | Species                |
|----|--------------|------------|---------------|---------------|---------------------|------------------------|
| 63 | YELWAR       | Warbler    | Passeroidea   | Parulidae     | <i>Dendroica</i>    | <i>petechia</i>        |
| 64 | LEAFLY       | Flycatcher | Tyrannoidea   | Tyrannidae    | <i>Empidonax</i>    | <i>minimus</i>         |
| 65 | PURFIN       | Finch      | Passeroidea   | Fringillidae  | <i>Burrica</i>      | <i>purpurea</i>        |
| 66 | REHWO        | Woodpecker | Piciformes    | Picidae       | <i>Melanerpes</i>   | <i>erythrocephalus</i> |
| 67 | YERWAR       | Warbler    | Passeroidea   | Parulidae     | <i>Dendroica</i>    | <i>coronata</i>        |
| 68 | BALORI       | Icterid    | Passeroidea   | Icteridae     | <i>Icterus</i>      | <i>galbula</i>         |
| 69 | CANWAR       | Warbler    | Passeroidea   | Parulidae     | <i>Wilsonia</i>     | <i>canadensis</i>      |
| 70 | SWATHR       | Thrush     | Muscicapoidea | Turdidae      | <i>Catharus</i>     | <i>ustulatus</i>       |
| 71 | PROWAR       | Warbler    | Passeroidea   | Parulidae     | <i>Protonotaria</i> | <i>citrea</i>          |
| 72 | WARVIR       | Vireo      | Corvoidea     | Vireonidae    | <i>Vireo</i>        | <i>gilvus</i>          |
| 73 | BUWWAR       | Warbler    | Passeroidea   | Parulidae     | <i>Vermivora</i>    | <i>pinus</i>           |
| 74 | BRNTHR       | Mimid      | Muscicapoidea | Mimidae       | <i>Toxostoma</i>    | <i>rufum</i>           |
| 75 | GOCKIN       | Kinglet    | Reguloidea    | Regulidae     | <i>Regulus</i>      | <i>satrapa</i>         |
| 76 | NASWAR       | Warbler    | Passeroidea   | Parulidae     | <i>Leiothlypis</i>  | <i>ruficapilla</i>     |
| 77 | SWASPA       | Finch      | Passeroidea   | Passerellidae | <i>Melospiza</i>    | <i>georgiana</i>       |
| 78 | CERWAR       | Warbler    | Passeroidea   | Parulidae     | <i>Dendroica</i>    | <i>cerulea</i>         |
| 79 | ORCORI       | Icterid    | Passeroidea   | Icteridae     | <i>Icterus</i>      | <i>spurius</i>         |

**Table S4. Statistics of the Bray–Curtis (BC) ordination axes**

| BC axis | Variance, % | Cumulative | Broken stick, $p_k$ | Cumulative | Row shuffled | Cumulative |
|---------|-------------|------------|---------------------|------------|--------------|------------|
| 1       | 16.74       | 16.74      | 6.27                | 6.27       | 2.97         | 2.97       |
| 2       | 11.91       | 28.64      | 5.00                | 11.27      | 2.64         | 5.61       |
| 3       | 7.47        | 36.11      | 4.37                | 15.64      | 2.58         | 8.19       |
| 4       | 7.65        | 43.76      | 3.95                | 19.59      | 2.49         | 10.68      |
| 5       | 6.06        | 49.82      | 3.63                | 23.23      | 2.22         | 12.90      |
| 6       | 4.16        | 53.98      | 3.38                | 26.60      | 2.44         | 15.34      |
| 7       | 3.90        | 57.88      | 3.17                | 29.77      | 2.34         | 17.68      |
| 8       | 2.94        | 60.81      | 2.99                | 32.76      | 2.78         | 20.46      |
| 9       | 3.36        | 64.18      | 2.83                | 35.59      | 2.62         | 23.08      |

**Table S5. Statistics for the Bray–Curtis scores over the 142 census sites**

|          | BC1    | BC2    | BC3    | BC4    | BC5   | BC6    | BC7   | BC8    | BC9    |
|----------|--------|--------|--------|--------|-------|--------|-------|--------|--------|
| <i>N</i> | 142    | 142    | 142    | 142    | 142   | 142    | 142   | 142    | 142    |
| Average  | 0.422  | 0.382  | 0.359  | 0.443  | 0.272 | 0.163  | 0.334 | 0.158  | 0.144  |
| SD       | 0.220  | 0.185  | 0.147  | 0.148  | 0.132 | 0.109  | 0.106 | 0.092  | 0.098  |
| Skewness | −0.076 | 0.384  | −0.026 | −0.718 | 0.924 | 1.933  | 0.632 | 1.604  | 0.598  |
| Kurtosis | −0.584 | 0.387  | −0.258 | 0.759  | 1.757 | 6.292  | 1.741 | 4.349  | 1.444  |
| Minimum  | 0.000  | −0.004 | 0.000  | 0.000  | 0.000 | −0.015 | 0.000 | −0.015 | −0.071 |
| Maximum  | 0.966  | 0.913  | 0.782  | 0.834  | 0.800 | 0.749  | 0.771 | 0.594  | 0.552  |

**Table S6. Distribution of variance (%) among taxonomic levels for a number of sites occupied per species, average density of each species in occupied sites, and total density (sites × local density) of each species**

| Taxonomic level | df | Sites | Average density | Total density |
|-----------------|----|-------|-----------------|---------------|
| Superfamily     | 11 | 9.7   | 0.0             | 0.6           |
| Family          | 9  | 0.0   | 8.3             | 0.0           |
| Genus           | 33 | 8.2   | 0.0             | 0.0           |
| Error           | 25 | 82.1  | 91.7            | 99.4          |

None of the variance components above the level of species within genera is significant. df, degrees of freedom.



**Table S7. Distribution of variance (%) among taxonomic levels for average score on the Bray–Curtis ordination axes**

| Taxonomic level | df | BC1  | BC2  | BC3  | BC4  | BC5  | BC6   | BC7  | BC8   | BC9   |
|-----------------|----|------|------|------|------|------|-------|------|-------|-------|
| Superfamily     | 11 | 0.0  | 0.0  | 0.0  | 0.0  | 5.7  | 0.0   | 14.5 | 0.0   | 0.0   |
| Family          | 9  | 12.7 | 24.4 | 14.4 | 10.2 | 0.0  | 0.0   | 0.0  | 0.0   | 0.0   |
| Genus           | 33 | 0.0  | 0.0  | 0.0  | 14.1 | 0.0  | 0.0   | 0.0  | 0.0   | 0.0   |
| Error           | 25 | 87.3 | 75.6 | 85.6 | 75.7 | 94.3 | 100.0 | 85.5 | 100.0 | 100.0 |

None of the variance components above the level of species within genera is significant.

**Table S8. Distribution of variance (%) among taxonomic levels for SD of the distribution on the Bray–Curtis ordination axes**

| Taxonomic level | df | SD1  | SD2  | SD3  | SD4  | SD5  | SD6  | SD7  | SD8   | SD9  |
|-----------------|----|------|------|------|------|------|------|------|-------|------|
| Superfamily     | 11 | 10.2 | 0.0  | 0.0  | 5.2  | 3.8  | 0.0  | 2.3  | 0.0   | 4.5  |
| Family          | 9  | 0.0  | 26.3 | 5.8  | 0.0  | 0.0  | 0.0  | 0.0  | 0.0   | 9.1  |
| Genus           | 33 | 0.0  | 3.5  | 0.0  | 0.0  | 0.0  | 7.9  | 0.0  | 0.0   | 0.0  |
| Error           | 25 | 89.8 | 70.2 | 94.2 | 94.8 | 96.2 | 92.1 | 97.7 | 100.0 | 86.4 |

None of the variance components above the level of species within genera is significant.

**Table S9. Distribution of variance (%) among taxonomic levels for scores on morphological principal components**

| Taxonomic level | df | PC1  | PC2  | PC3  | PC4  | PC5  | PC6  | PC7  | PC8  |
|-----------------|----|------|------|------|------|------|------|------|------|
| Superfamily     | 10 | 0.8  | 28.4 | 33.7 | 55.4 | 0.0  | 0.0  | 30.0 | 5.1  |
| Family          | 9  | 68.6 | 34.1 | 40.8 | 16.7 | 27.9 | 55.8 | 30.2 | 9.5  |
| Genus           | 31 | 24.1 | 0.0  | 20.5 | 18.5 | 34.1 | 22.8 | 8.0  | 57.0 |
| Error           | 24 | 6.5  | 37.5 | 5.0  | 9.3  | 38.0 | 21.4 | 31.8 | 28.4 |

Most of the variance components above the level of species within genera are significant. Principal components analysis was performed on the covariance matrix of  $\log_{10}$ -transformed measurements of eight external variables (total length, wing length, tail length, tarsus length, midtoe length, and the length, breadth, and depth of the bill) (1).

1. Ricklefs RE, Travis L (1980) A morphological approach to the study of avian community organization. *Auk* 97:321–338.

**Table S10. Analysis of variance of species scores ( $n = 75$ ) on axes 1–8 of a principal components analysis based on eight morphological measurements, with 19 foraging groups as the main effect**

|                        | PC1     | PC2     | PC3     | PC4     | PC5    | PC6     | PC7     | PC8    |
|------------------------|---------|---------|---------|---------|--------|---------|---------|--------|
| <i>F</i> (df = 18, 56) | 11.9    | 6.8     | 14.9    | 12.2    | 2.2    | 5.3     | 5.6     | 2.4    |
| <i>P</i>               | <0.0001 | <0.0001 | <0.0001 | <0.0001 | 0.0122 | <0.0001 | <0.0001 | 0.0071 |
| <i>R</i> <sup>2</sup>  | 0.793   | 0.687   | 0.827   | 0.797   | 0.416  | 0.628   | 0.644   | 0.433  |
